# Supplementary material for: Body Weight, BMI, Percent Fat and Associations with Mortality and Incident Mobility Limitation in Older Men
Source: MDPI journal article supplement (doi:10.3390/geriatrics6020053), 2021-05-18
Supplement: s1 [file s1]

**Supplementary Table S1.** Pearson correlation coefficients between weight, body mass index, ALM/ht<sup>2</sup> and percent body fat in older men.

|                     | % fatALM/ht <sup>2</sup> Weight |      |      |
|---------------------|---------------------------------|------|------|
| BMI                 | 0.68                            | 0.74 | 0.87 |
| Weight              | 0.60                            | 0.67 |      |
| ALM/ht <sup>2</sup> | 0.11                            |      |      |
